# Supplementary material
Source: PubMed Central journal article supplement (PMC3771280)

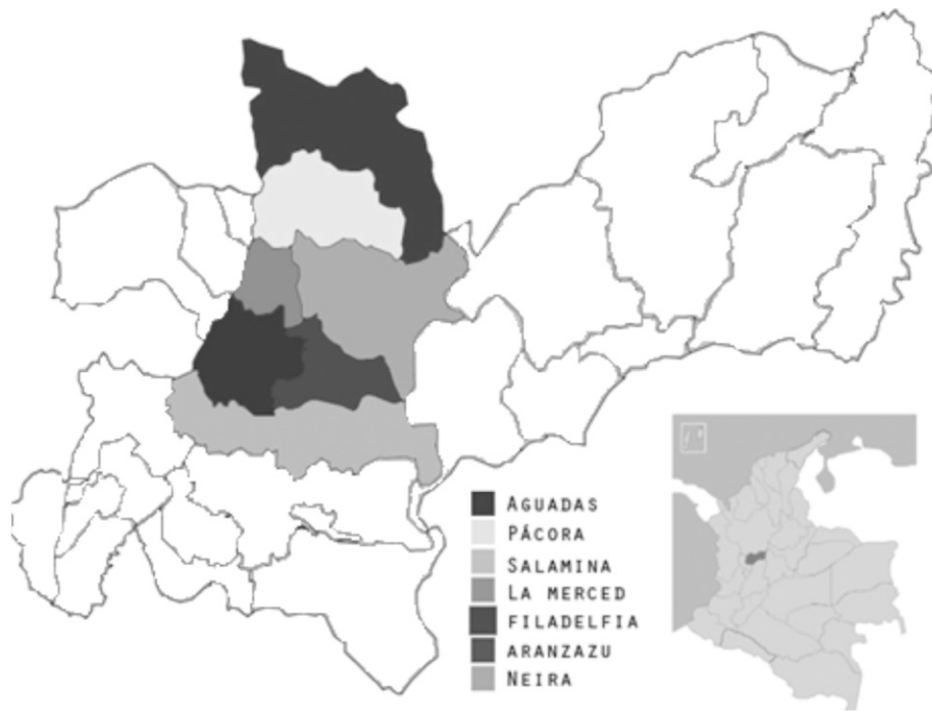

SUPPLEMENTAL FIGURE 1. Geographical location of municipalities included in the study.

Supplement: SD1.pdf [file SD1.pdf]
